# Supplementary material for: Crystal structure and substrate specificity of plant adenylate isopentenyltransferase from Humulus lupulus: distinctive binding affinity for purine and pyrimidine nucleotides
Source: PubMed Central journal article supplement — Nucleic Acids Res. 2009 Dec 10;38(5):1738–48. doi: 10.1093/nar/gkp1093 (PMC2836551; doi:10.1093/nar/gkp1093), 2009-12-10

**SUPPLEMENTARY DATA**

Figure S1. **Omit map for the bound ATP.** The final *HIAIPT*/ATP/ $\text{PO}_4$  complex model was subjected to 10 different cycles of simulated annealing with the ATP omitted. The resulting 10 models with R values of 21.6 – 21.9% and  $R_{\text{free}}$  of 26.6 – 27.5% were then combined to calculate a composite omit map, which had an overall FOM of 0.84. The model of ATP is shown as sticks superimposed on the omit map contoured as purple mesh at  $3\text{-}\sigma$  level. The protein model is shown as a cartoon diagram in cyan and so are some side chains as rods.

Figure S2. **Surface charge distribution in the nucleotide binding site.** The protein surfaces of three complex structures *HIAIPT*/ATP, *Agrobacterium* AIPT/AMP and tRNA-IPT/tRNA (core domain, aa13-122 and aa197-340) reveal that the distribution of positively charged residues of *HIAIPT* is more similar to that of tRNA-IPT than *Agrobacterium* AIPT.

Figure S3. **Multiple sequence alignment of AIPTs.** The sequence of *HIAIPT* is compared with other plant AIPT (isozymes from *Arabidopsis*) and *Agrobacterium* AIPT (Tzs). The identical and similar amino acid residues are shaded in colors according to their types. The conserved phosphate binding motif, [G or A]-X<sub>4</sub>-G-K-[S

or T], is highlighted in a black box. The red circles indicate the interacting amino acids with the bound phosphate ion (in the DMAPP-binding site), and the blue asterisks indicate the interacting residues with the ATP molecule.

**Figure S4. Typical ITC trace for the interaction between AIPT and nucleotides.**

Titration data obtained from AIPT and nucleotides as described in Materials and Methods (upper panel). The binding isotherms for the interaction between *HIAIPT* and ATP, ADP, dATP, GTP, CTP or UTP were obtained by isothermal titration calorimetry (bottom panel), which consisted of integrated heats (black squares) and the heat expected from the fitted model (black line). Results of ATP in the presence of 2.5 mM Mg<sup>2+</sup> are also included. The heat of dilution of nucleotides into buffer has been subtracted.

**Figure S5. Comparison of binding site surrounding the hydrophobic end of the**

**isopentenyl group.** Equivalent residues of *H. lupulus* and *Agrobacterium* AIPT are shown in gray and cyan. The surfaces of the isopentenyl group binding cavity are shown as mesh in magenta and cyan, respectively.

S1

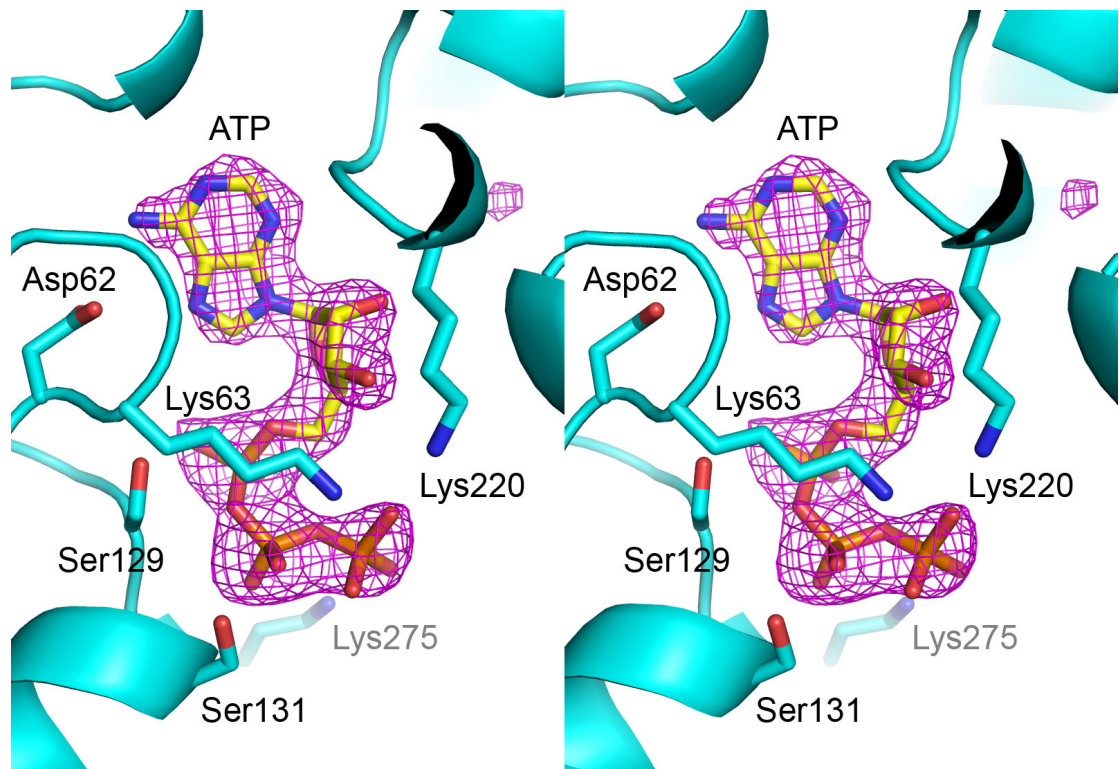

*Hl*AIPT

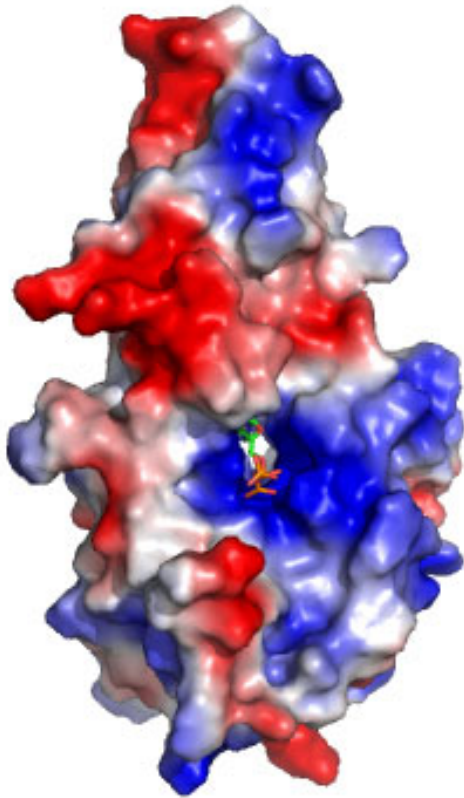

*Agrobacterium* AIPT

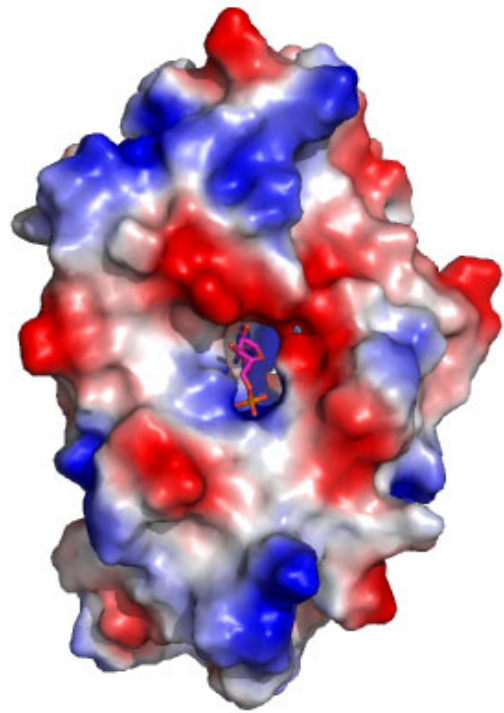

tRNA-IPT

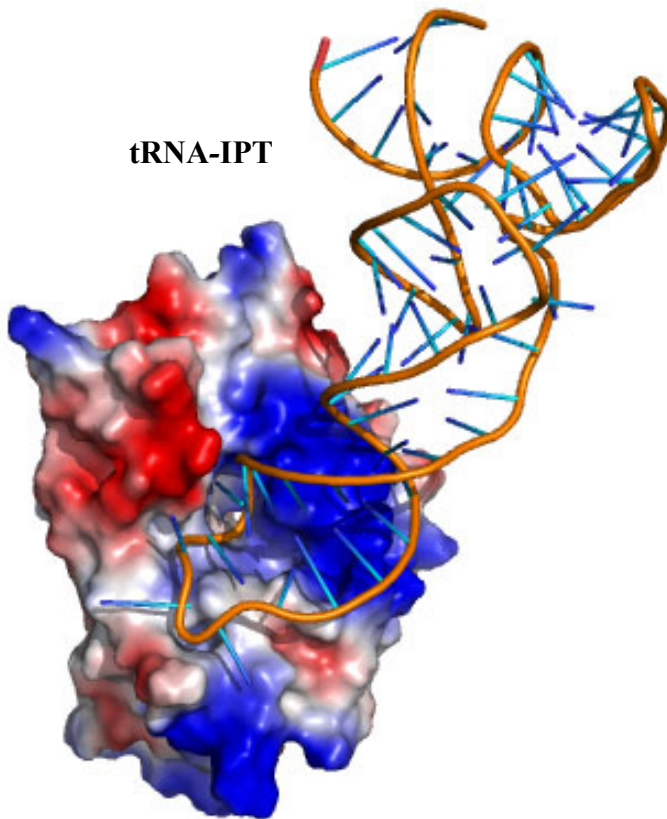



|           |     |                                                                          |     |
|-----------|-----|--------------------------------------------------------------------------|-----|
| H.lupulus | 1   | -----MDYASVAMAAAPT TTTTNTVSLRRQRHRK                                      | 35  |
| M.alba    | 1   | -----MEFSSSAARRHRHRHPK                                                   | 22  |
| AtIPT1    | 1   | MTELNFLHLLPIISDRFTTTTTTSPSFSSSHSSSSSSLSLFTKRRRKHQPLVSSIRMEQSRSRNRK       | 70  |
| AtIPT3    | 1   | -----MIMKISMAMCKQLPSPPT-LDFPPARFGPNMLTLNPGPK                             | 46  |
| AtIPT4    | 1   | -----MKCN                                                                | 10  |
| AtIPT5    | 1   | -----MKPCMTALRQVIQPLSLNFGQNMVDVPPFRRK                                    | 38  |
| AtIPT7    | 1   | -----MKFSISSLKQVQPILCFKNKLSKVNVSFLHPK                                    | 39  |
| AtIPT8    | 1   | -----MQNLTSTFVSPSMIPITSPRLRPLPPRSRVVPMTTVCMEQSYK                         | 48  |
| Tzs       | 1   | -----MLHLI                                                               | 6   |
| tRNA-IPT  | 1   | -----MLKGPLKGCNLMSK                                                      | 19  |
| H.lupulus | 36  | MGATGTTGKSRSLSIDLAHFPLEVINSDKMQVYKGLDITTNKISVPDRGVPVHLLGEVDP-PARGELTPAD  | 104 |
| M.alba    | 23  | MGATGTTGKSRSLSVELATHFNGBERINSDKMQVYKGLDITTNKIPLDLDRRLLGGEVDSSEAHGELTRSE  | 92  |
| AtIPT1    | 71  | LGATGTTGKSRSLSVDLATRFPAERINSDKIQVYKGLDITTNKIQITLQDRRLLGGEVDSSEAHGELTRSE  | 139 |
| AtIPT3    | 47  | MGATGTTGKSRSLSVDIATRFPAERINSDKIQVYKGLDITTNKIQITLQDRRLLGGEVDSSEAHGELTRSE  | 114 |
| AtIPT4    | 11  | MGATGTTGKSRSLSVDLALHFKAERINSDKMQFYDGLDITTNKQSTIEDRRVPHLLGELN-PEAGVETAED  | 79  |
| AtIPT5    | 39  | MGATGTTGKSRSLLAIDLATRFPAERINSDKIQVYKGLDITTNKVTPEESLGVPHLLGTVH-DTYEDFTAED | 107 |
| AtIPT7    | 40  | MGATGTTGKSRSLLAIDLATRFPAERINSDKIQVYKGLDITTNKVTPEESLGVPHLLGTVH-DTYEDFTAED | 108 |
| AtIPT8    | 49  | MGATGTTGKSRSLLAIDLATRFPAERINSDKIQVYKGLDITTNKVTPEESLGVPHLLGTVH-DTYEDFTAED | 117 |
| Tzs       | 7   | YGPTTGSKSTDMAIQIAQETGWVVALDRVQCCPQIATGSGRPLESELQSTRRIYLDSTRP-LTGLDAES    | 75  |
| tRNA-IPT  | 20  | AGTTCVGSKSTQLSIQIAQKFNGEVINDSQMVAIKDIPITNKHPLQEREGTIPHHVNHVD--WSEYYSHR   | 87  |
| H.lupulus | 105 | FRSLAGKAVSEITGRRKLPVLVGGSSSFIHALLVDRFDSS-GPGVFEEGSHSVSS--                | 159 |
| M.alba    | 93  | FRSLAGKAVSEITARRKLPVLVGGSSSFIHALLVDRFD--EYDVFEDERSDQPADSSK--             | 148 |
| AtIPT1    | 140 | FRSAASNVKSEITSRQVPIIAGGSSSFIHALLVDRFD--KFDPFSSGSLISSD--                  | 193 |
| AtIPT3    | 115 | YCHMANLSIESVLNRGKLPVIVGGSSSYVEALVDDKENK--FRSR--                          | 157 |
| AtIPT4    | 80  | FRVMAEAIAEITQRKKLPVILAAGSSNSYIEALLAKSVDF--ENYPFSDHKGSLTCE--              | 133 |
| AtIPT5    | 108 | FRVMAEAIAEITQRKKLPVILAAGSSNSYIEALLAKSVDF--ENYPFSDHKGSLTCE--              | 149 |
| AtIPT7    | 109 | YSLASQAIKLSANNKLPVIVAGGSSNSYIEALLVHSSGF--L--                             | 151 |
| AtIPT8    | 118 | FRSLASRSIEITARGNLPVIVAGGSSNSFIHALVDRFD--KTYPFSS-ETSISSG--                | 170 |
| Tzs       | 76  | AHRRLIFEVDRWKSEEGHLILEGGSLSLNCAKSKPFWR--SGFQWHV--                        | 122 |
| tRNA-IPT  | 88  | FETECMNAIDITHRRGKIPVIVGGTTHYLYLQTLFNKRVDTKSSERKLTRKQLDILESTDPDVIYNTLVKCD | 157 |
| H.lupulus | 159 | -----E LRYDCCFLWVDVSVKVLTDYLAKRVD DMLLEL                                 | 191 |
| M.alba    | 148 | -----VL LRYNCCFLWVDVSLRVLLEDYLLKRVDD DMLLEL                              | 181 |
| AtIPT1    | 193 | -----LRYECCFLWVDVSETVLYEYLLRVRDD DMLMDS                                  | 224 |
| AtIPT3    | 157 | -----YDCCFLWVDVALPVLHGFVSEVDRDKMVES                                      | 186 |
| AtIPT4    | 133 | -----LKYDCCFLWVDVQSVLFEYLSRDLMMKS                                        | 164 |
| AtIPT5    | 149 | -----YNCCFLWVDVSRPVLHSHFVSEVDRDKMVD                                      | 178 |
| AtIPT7    | 151 | -----YDCCFLWVDVSLPVLNSFVSEVDRDKMME                                       | 180 |
| AtIPT8    | 170 | -----LRYECCFLWVDVSVSLVFEYLSKRVDDQMMES                                    | 201 |
| Tzs       | 122 | -----LRLGDSDAFLTRAKQVAEMFAITRED--RP                                      | 150 |
| tRNA-IPT  | 158 | PDIAATKYHPNDYRRVQRMLEIYYKTGKKPSETFNEQKIT LKFDTLFLWVYSKPEPLFQRLDDRVDDMLER | 227 |
| H.lupulus | 192 | GMFDELAEFYSP EDEHDHDEDSATRGLRKAIGVPEERDRYFEKFRPGDVEGEDPGRDRVRRGAEFEAVRAI | 261 |
| M.alba    | 182 | GMFDELAEFYDPE-EDHG--PANWTGLRKAIGVPEERDRYFERCRPGEK-GE--WDRVREAYFEAVREI    | 244 |
| AtIPT1    | 225 | GMFDELAEFYDFVKSGL--TR-FGIRKAIGVPEERDRYFKYEPPEK--KMIKWDALRKAAYDKAVDDI     | 287 |
| AtIPT3    | 187 | GMVDELAEFYDFNSDYS--R-RGIRKAIGVPEERDRYFRNEQ-FL--N--VEDREELSKVLEI          | 242 |
| AtIPT4    | 165 | GMFDELAEFYHRSKKAPK--P-LGIRKAIGVPEERDRYDLRMYKWDN--DMDKWDPMRKEAYEKAVRAI    | 226 |
| AtIPT5    | 179 | GLVDEVRRIIDPSSSDYS--G-AGIRRAIGVPEERDRYFLRSEMRNY--P--AETTERLETAIEKI       | 235 |
| AtIPT7    | 181 | GMFDELAEFYDFNPKAN-YS--G-IRRAIGVPEERDRYFLRSEMRNY--P--AETTERLETAIEKI       | 235 |
| AtIPT8    | 202 | GMFDELAEFYDFRYSGSA--IRAHGIRKAIGVPEERDRYFSLYPPERKQKMSWDQARKGAYDEAVQEI     | 267 |
| Tzs       | 151 | SLLRRLRRLAELWYYP--AARPILEDIDGIRCAIRFAKHDLAISQLPN--IDAGRHWLEI             | 207 |
| tRNA-IPT  | 228 | GALRRLRRLAELWYYP--AARPILEDIDGIRCAIRFAKHDLAISQLPN--IDAGRHWLEI             | 207 |
| H.lupulus | 262 | KENTICHLAKRQIGKILRLKLAG--WDLRRLDATERAFRAAMTSDSGE--KCTEIEWEKVLEP SVKIV    | 323 |
| M.alba    | 245 | KENTICHLAKRQIGKILRLKLAG--WDLRRLDATERAFRAAMTSDSGE--KCTEIEWEKVLEP SVKIV    | 306 |
| AtIPT1    | 288 | KRNTICHLAKRQIGKILRLKLAG--WDLRRLDATERAFRAAMTSDSGE--KCTEIEWEKVLEP SVKIV    | 350 |
| AtIPT3    | 243 | KRNTICHLAKRQIGKILRLKLAG--WDLRRLDATERAFRAAMTSDSGE--KCTEIEWEKVLEP SVKIV    | 302 |
| AtIPT4    | 227 | KENTICHLAKRQIGKILRLKLAG--WDLRRLDATERAFRAAMTSDSGE--KCTEIEWEKVLEP SVKIV    | 293 |
| AtIPT5    | 236 | KENTICHLAKRQIGKILRLKLAG--WDLRRLDATERAFRAAMTSDSGE--KCTEIEWEKVLEP SVKIV    | 293 |
| AtIPT7    | 236 | KENTICHLAKRQIGKILRLKLAG--WDLRRLDATERAFRAAMTSDSGE--KCTEIEWEKVLEP SVKIV    | 294 |
| AtIPT8    | 268 | KENTICHLAKRQIGKILRLKLAG--WDLRRLDATERAFRAAMTSDSGE--KCTEIEWEKVLEP SVKIV    | 321 |
| Tzs       | 208 | KENTICHLAKRQIGKILRLKLAG--WDLRRLDATERAFRAAMTSDSGE--KCTEIEWEKVLEP SVKIV    | 243 |
| tRNA-IPT  | 286 | KENTICHLAKRQIGKILRLKLAG--WDLRRLDATERAFRAAMTSDSGE--KCTEIEWEKVLEP SVKIV    | 335 |
| H.lupulus | 324 | SRFLDE--                                                                 | 329 |
| M.alba    | 307 | KRFLDE--                                                                 | 312 |
| AtIPT1    | 351 | KRHLLVQN--                                                               | 357 |
| AtIPT3    | 303 | SRFLDLIASRRPLVEASTAVAAAMERELSRCLVA--                                     | 336 |
| AtIPT4    | 294 | RSHLDQPINYYYYYFLLKRFSLN--                                                | 318 |
| AtIPT5    | 294 | EKFLSYDDHHLEGANILLPEISAVPPLPAAVAAISR--                                   | 330 |
| AtIPT7    | 295 | DKFYNNQLKNDVEHCLAAASYGGSGSRAHNM I--                                      | 329 |
| AtIPT8    | 322 | KRFLVKDKV--                                                              | 330 |
| Tzs       | 243 | -----                                                                    | 243 |
| tRNA-IPT  | 336 | NDFISNRPIKQERAPKALELLSKGETTMMKLLDWDHYTCNVCRNADGKNVVAIGEKYWKIHLGSRRHKS    | 405 |
| H.lupulus | 329 | -----                                                                    | 329 |
| M.alba    | 312 | -----                                                                    | 312 |
| AtIPT1    | 357 | -----                                                                    | 357 |
| AtIPT3    | 336 | -----                                                                    | 336 |
| AtIPT4    | 318 | -----                                                                    | 318 |
| AtIPT5    | 330 | -----                                                                    | 330 |
| AtIPT7    | 329 | -----                                                                    | 329 |
| AtIPT8    | 330 | -----                                                                    | 330 |
| Tzs       | 243 | -----                                                                    | 243 |
| tRNA-IPT  | 406 | NLKRNTROADFEKWKINKKETVE                                                  | 428 |

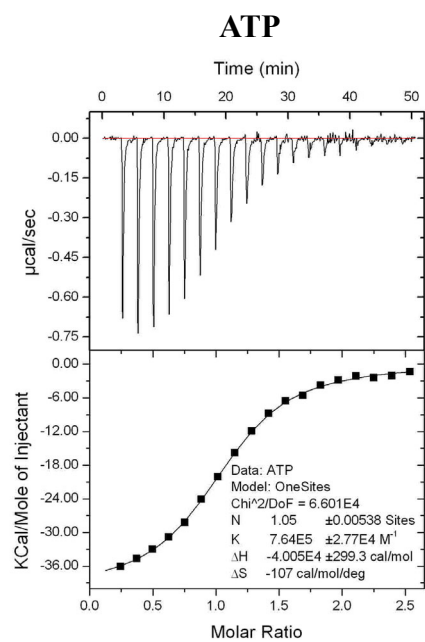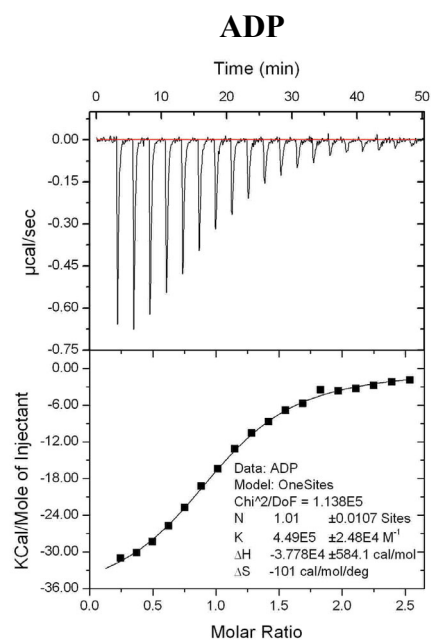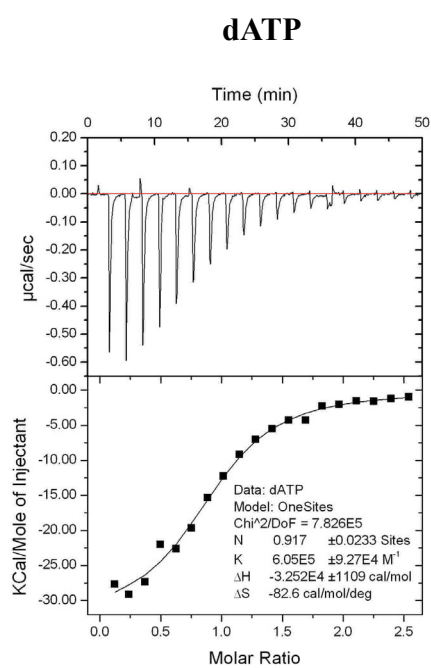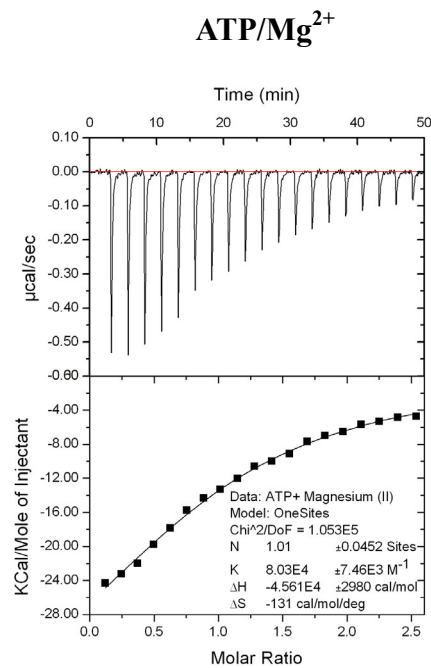

continued

### GTP

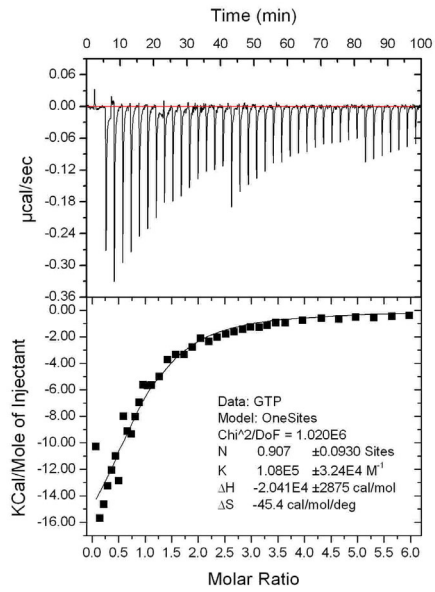

### CTP

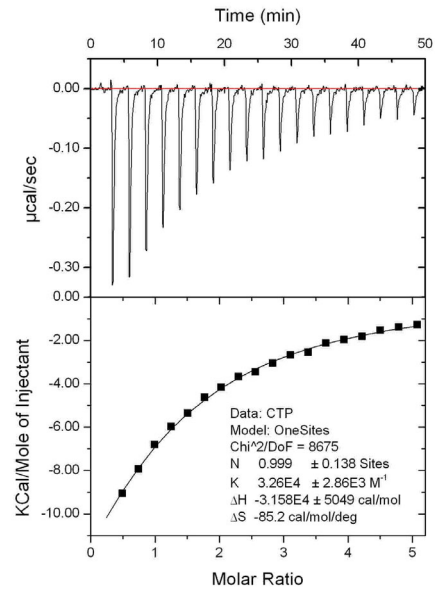

### UTP

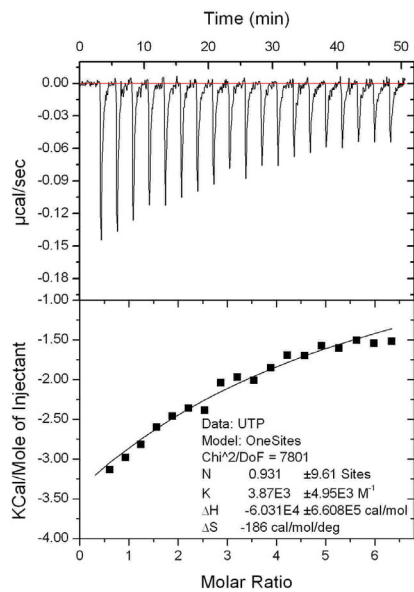

S5

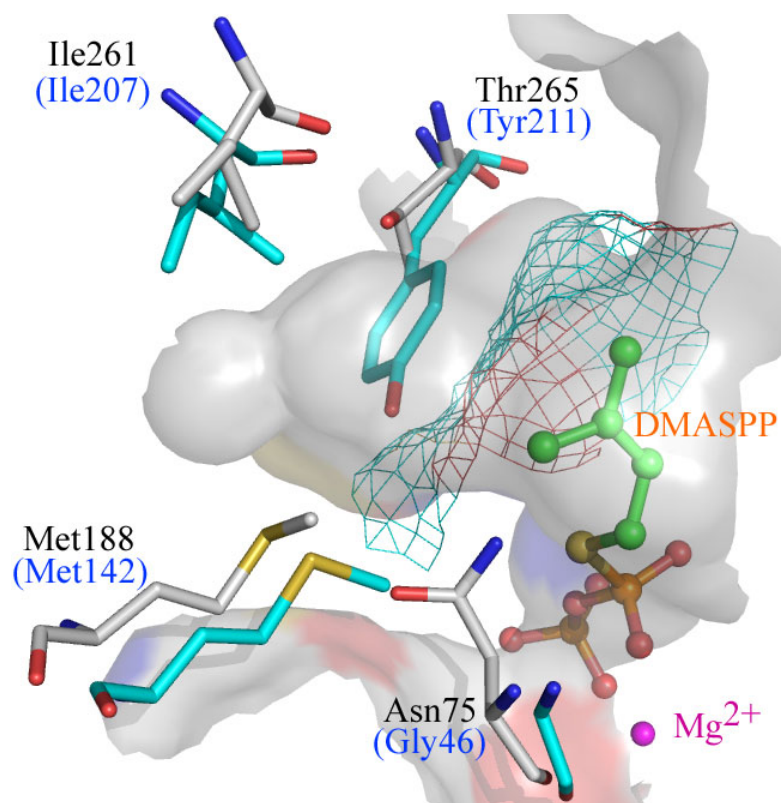

Supplement: gkp1093_1.pdf [file gkp1093_1.pdf]
